# Supplementary material for: Correcting Autoinflammation in STING-Associated Vasculopathy with Onset in Infancy (SAVI) by Human Stem Cell Genome-Editing
Source: Research Square preprint supplement (doi:10.21203/rs.3.rs-5090716/v1), 2024-10-21
Supplement: Supplementary file 1 [file 1b7b67532bfc04a40b69b149.ai]

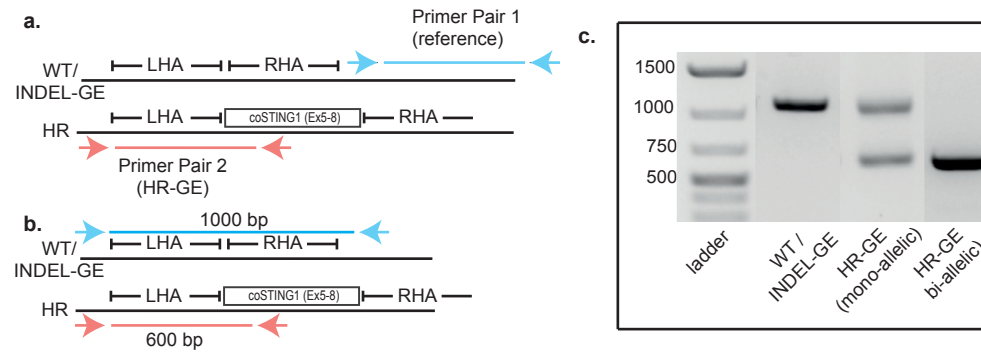

**Supplementary Fig. 2** ddPCR and PCR tools used for genotyping. **a.** Strategy for measuring the integration percentage by ddPCR. The integration percentage was calculated by dividing the number of events recorded with Primer pairs 2 by the number of events recorded with Primer pairs 1 (reference). **b.** In-Out 3 primers PCR strategy for genotyping on-target integration events in HSPC and iPSCs.
