# Supplementary material for: Correcting Autoinflammation in STING-Associated Vasculopathy with Onset in Infancy (SAVI) by Human Stem Cell Genome-Editing
Source: Research Square preprint supplement (doi:10.21203/rs.3.rs-5090716/v1), 2024-10-21
Supplement: Supplementary file 1 [file db355498ed1148af7a1221c2.xlsx]

## Sheet: Sheet1
Result	Query tag	Search result	Query type	Mismatch	Ends with RG	Chr Position	Strand	Cut site	Score
GCCCTGCAGAGATCTCAGCTGGG -- hit ACACTGCAGAGATCTCAGCTNGG -- query	Query: ACACTGCAGAGATCTCAGCTNGG	hit: GCCCTGCAGAGATCTCAGCTGGG	No indel	2	Yes	Chr16:56246012-56246034	-	56246018	0.27
AGACTGATAGATCTCAGCTAGG -- hit ACACTGAGAGATCTCAGCTNGG -- query	Query: ACACTGAGAGATCTCAGCTNGG	hit: AGACTGATAGATCTCAGCTAGG	Del 14	2	Yes	Chr13:35360631-35360652	+	35360646	1.22
TCACTCAGTGATCTCAGCTGGG -- hit ACACTCAGAGATCTCAGCTNGG -- query	Query: ACACTCAGAGATCTCAGCTNGG	hit: TCACTCAGTGATCTCAGCTGGG	Del 15	2	Yes	Chr9:99463346-99463367	+	99463361	1.34
CACTTCAGACATCTCAGCTTGG -- hit CACTGCAGAGATCTCAGCTNGG -- query	Query: CACTGCAGAGATCTCAGCTNGG	hit: CACTTCAGACATCTCAGCTTGG	Del 20	2	Yes	Chr2:71937864-71937885	-	71937870	1.54
AAAATGCAGAGTCTCAGCTAGG -- hit ACACTGCAGAGTCTCAGCTNGG -- query	Query: ACACTGCAGAGTCTCAGCTNGG	hit: AAAATGCAGAGTCTCAGCTAGG	Del 9	2	Yes	Chr9:111011953-111011974	+	111011968	1.61
CCACTGCACAATCTCAGCTGGG -- hit ACACTGCAGAATCTCAGCTNGG -- query	Query: ACACTGCAGAATCTCAGCTNGG	hit: CCACTGCACAATCTCAGCTGGG	Del 10	2	Yes	Chr8:40788543-40788564	+	40788558	1.68
ACACACAGAGATATCAGCTGGG -- hit ACACGCAGAGATCTCAGCTNGG -- query	Query: ACACGCAGAGATCTCAGCTNGG	hit: ACACACAGAGATATCAGCTGGG	Del 16	2	Yes	Chr8:126231806-126231827	+	126231821	2.21
ACACACAGAGATGTCAGCTAGG -- hit ACACGCAGAGATCTCAGCTNGG -- query	Query: ACACGCAGAGATCTCAGCTNGG	hit: ACACACAGAGATGTCAGCTAGG	Del 16	2	Yes	Chr2:134629834-134629855	-	134629840	2.21
ACATTGAAGAGATTCAGCTAGG -- hit ACACTGCAGAGATTCAGCTNGG -- query	Query: ACACTGCAGAGATTCAGCTNGG	hit: ACATTGAAGAGATTCAGCTAGG	Del 7	2	Yes	Chr2:179165206-179165227	-	179165212	2.21
CACTGCAGGGAGCTCAGCTGGG -- hit CACTGCAGAGATCTCAGCTNGG -- query	Query: CACTGCAGAGATCTCAGCTNGG	hit: CACTGCAGGGAGCTCAGCTGGG	Del 20	2	Yes	Chr3:17094619-17094640	+	17094634	2.23
ACACTGCGGTGATTCTCAGCTGGG -- hit ACACTGCAGAGANTCTCAGCTNGG -- query	Query: ACACTGCAGAGANTCTCAGCTNGG	hit: ACACTGCGGTGATTCTCAGCTGGG	Ins 8	2	Yes	Chr10:117217258-117217281	+	117217275	2.57
ACACTGAGAGATCACAGCTGGG -- hit ACACTGAGAGATCTCAGCTNGG -- query	Query: ACACTGAGAGATCTCAGCTNGG	hit: ACACTGAGAGATCACAGCTGGG	Del 14	1	Yes	Chr3:157363588-157363609	-	157363594	2.64
TCCTGCAGAGATCACAGCTGGG -- hit ACCTGCAGAGATCTCAGCTNGG -- query	Query: ACCTGCAGAGATCTCAGCTNGG	hit: TCCTGCAGAGATCACAGCTGGG	Del 18	2	Yes	Chr17:74099629-74099650	+	74099644	2.68
ACACTTGCAGAGTCCTCAGCTCGG -- hit ACACNTGCAGAGATCTCAGCTNGG -- query	Query: ACACNTGCAGAGATCTCAGCTNGG	hit: ACACTTGCAGAGTCCTCAGCTCGG	Ins 16	2	Yes	Chr9:89606272-89606295	-	89606278	2.79
ACACTGGCAGAGGGCTCAGCTGGG -- hit ACACTNGCAGAGATCTCAGCTNGG -- query	Query: ACACTNGCAGAGATCTCAGCTNGG	hit: ACACTGGCAGAGGGCTCAGCTGGG	Ins 15	2	Yes	Chr1:4054172-4054195	-	4054178	2.81
AACTGCATAGATCTGAGCTGGG -- hit AACTGCAGAGATCTCAGCTNGG -- query	Query: AACTGCAGAGATCTCAGCTNGG	hit: AACTGCATAGATCTGAGCTGGG	Del 19	2	Yes	Chr21:42179561-42179582	+	42179576	3.29
ACACAGCAGAATCCCAGCTGGG -- hit ACACTGCAGAATCTCAGCTNGG -- query	Query: ACACTGCAGAATCTCAGCTNGG	hit: ACACAGCAGAATCCCAGCTGGG	Del 10	2	Yes	Chr5:151467228-151467249	-	151467234	3.3
ACACTGAGATATCCCAGCTGGG -- hit ACACTGAGAGATCTCAGCTNGG -- query	Query: ACACTGAGAGATCTCAGCTNGG	hit: ACACTGAGATATCCCAGCTGGG	Del 14	2	Yes	Chr10:128684966-128684987	-	128684972	3.34
ACATGCAGAGCTCCCAGCTAGG -- hit ACATGCAGAGATCTCAGCTNGG -- query	Query: ACATGCAGAGATCTCAGCTNGG	hit: ACATGCAGAGCTCCCAGCTAGG	Del 17	2	Yes	Chr22:32850530-32850551	+	32850545	3.38
CACTGCAGAGACCCCAGCTGGG -- hit CACTGCAGAGATCTCAGCTNGG -- query	Query: CACTGCAGAGATCTCAGCTNGG	hit: CACTGCAGAGACCCCAGCTGGG	Del 20	2	Yes	Chr22:44707717-44707738	+	44707732	3.63
ACATGCAGACATCTAAGCTGGG -- hit ACATGCAGAGATCTCAGCTNGG -- query	Query: ACATGCAGAGATCTCAGCTNGG	hit: ACATGCAGACATCTAAGCTGGG	Del 17	2	Yes	Chr11:40100460-40100481	-	40100466	3.68
ACATGCAGAGAACTGAGCTGGG -- hit ACATGCAGAGATCTCAGCTNGG -- query	Query: ACATGCAGAGATCTCAGCTNGG	hit: ACATGCAGAGAACTGAGCTGGG	Del 17	2	Yes	Chr2:113117679-113117700	-	113117685	4.08
ACACTGCAGAAGAGCACAGCTGGG -- hit ACACTGCAGNAGATCTCAGCTNGG -- query	Query: ACACTGCAGNAGATCTCAGCTNGG	hit: ACACTGCAGAAGAGCACAGCTGGG	Ins 11	2	Yes	Chr3:178996707-178996730	+	178996724	4.2
ACACTGCAGAAGCCCAGCTGGG -- hit ACACTGCAGAATCTCAGCTNGG -- query	Query: ACACTGCAGAATCTCAGCTNGG	hit: ACACTGCAGAAGCCCAGCTGGG	Del 10	2	Yes	Chr5:151288420-151288441	+	151288435	4.21
CACTGCAGAGTTCTCCGCTGGG -- hit CACTGCAGAGATCTCAGCTNGG -- query	Query: CACTGCAGAGATCTCAGCTNGG	hit: CACTGCAGAGTTCTCCGCTGGG	Del 20	2	Yes	Chr16:27313664-27313685	+	27313679	4.43
AACTGCAGAGAGCTCTGCTGGG -- hit AACTGCAGAGATCTCAGCTNGG -- query	Query: AACTGCAGAGATCTCAGCTNGG	hit: AACTGCAGAGAGCTCTGCTGGG	Del 19	2	Yes	Chr5:2663498-2663519	-	2663504	4.74
ACTCTGCACAGATCTCACTGGG -- hit ACACTGCAGAGATCTCACTNGG -- query	Query: ACACTGCAGAGATCTCACTNGG	hit: ACTCTGCACAGATCTCACTGGG	Del 3	2	Yes	Chr2:50910899-50910920	+	50910914	5.01
ACACTGAACAGATCTCACTAGG -- hit ACACTGCAGAGATCTCACTNGG -- query	Query: ACACTGCAGAGATCTCACTNGG	hit: ACACTGAACAGATCTCACTAGG	Del 3	2	Yes	Chr1:82187575-82187596	-	82187581	5.09
AAACTGCAGACATCTCACTTGG -- hit ACACTGCAGAGATCTCACTNGG -- query	Query: ACACTGCAGAGATCTCACTNGG	hit: AAACTGCAGACATCTCACTTGG	Del 3	2	Yes	Chr9:68629521-68629542	+	68629536	5.34
ACATGCAGAGATCACTGCTGGG -- hit ACATGCAGAGATCTCAGCTNGG -- query	Query: ACATGCAGAGATCTCAGCTNGG	hit: ACATGCAGAGATCACTGCTGGG	Del 17	2	Yes	Chr2:128183228-128183249	+	128183243	5.58
ACAGGGCAGAGATCTCAGTAGG -- hit ACACTGCAGAGATCTCAGTNGG -- query	Query: ACACTGCAGAGATCTCAGTNGG	hit: ACAGGGCAGAGATCTCAGTAGG	Del 2	2	Yes	Chr14:27130648-27130669	-	27130654	5.87
CACTGCAGAGATTTCATCTTGG -- hit CACTGCAGAGATCTCAGCTNGG -- query	Query: CACTGCAGAGATCTCAGCTNGG	hit: CACTGCAGAGATTTCATCTTGG	Del 20	2	Yes	ChrX:111021667-111021688	-	111021673	5.93
ACACTGCAAGATCTGTGCTTGG -- hit ACACTGCAAGATCTCAGCTNGG -- query	Query: ACACTGCAAGATCTCAGCTNGG	hit: ACACTGCAAGATCTGTGCTTGG	Del 12	2	Yes	Chr14:93840500-93840521	-	93840506	6.16
ACACTGCAGGATATCATCTAGG -- hit ACACTGCAGGATCTCAGCTNGG -- query	Query: ACACTGCAGGATCTCAGCTNGG	hit: ACACTGCAGGATATCATCTAGG	Del 11	2	Yes	Chr7:9692525-9692546	+	9692540	6.31
ACACTACAGACATCTCAGTTGG -- hit ACACTGCAGAGATCTCAGTNGG -- query	Query: ACACTGCAGAGATCTCAGTNGG	hit: ACACTACAGACATCTCAGTTGG	Del 2	2	Yes	Chr9:8022583-8022604	+	8022598	6.42
ACACTGTAGACATCTCAGTTGG -- hit ACACTGCAGAGATCTCAGTNGG -- query	Query: ACACTGCAGAGATCTCAGTNGG	hit: ACACTGTAGACATCTCAGTTGG	Del 2	2	Yes	Chr4:164491754-164491775	-	164491760	6.44
AACTGCAGAGATCCCAACTGGG -- hit AACTGCAGAGATCTCAGCTNGG -- query	Query: AACTGCAGAGATCTCAGCTNGG	hit: AACTGCAGAGATCCCAACTGGG	Del 19	2	Yes	ChrX:133241507-133241528	+	133241522	6.54
CCACTGCAGAGAGCTCAGTGGG -- hit ACACTGCAGAGATCTCAGTNGG -- query	Query: ACACTGCAGAGATCTCAGTNGG	hit: CCACTGCAGAGAGCTCAGTGGG	Del 2	2	Yes	Chr2:175865126-175865147	+	175865141	6.73
ACACTGCAGAGACTAGGCTTGG -- hit ACACTGCAGAGACTCAGCTNGG -- query	Query: ACACTGCAGAGACTCAGCTNGG	hit: ACACTGCAGAGACTAGGCTTGG	Del 8	2	Yes	Chr1:151799757-151799778	-	151799763	6.91
ACACTGCAGACTTCTCAGTTGG -- hit ACACTGCAGAGATCTCAGTNGG -- query	Query: ACACTGCAGAGATCTCAGTNGG	hit: ACACTGCAGACTTCTCAGTTGG	Del 2	2	Yes	Chr12:11364217-11364238	-	11364223	7.01
ACACTGCAGACTTCTCAGTTGG -- hit ACACTGCAGAGATCTCAGTNGG -- query	Query: ACACTGCAGAGATCTCAGTNGG	hit: ACACTGCAGACTTCTCAGTTGG	Del 2	2	Yes	Chr12:11373751-11373772	-	11373757	7.01
ACACTGCAGACTTCTCAGTTGG -- hit ACACTGCAGAGATCTCAGTNGG -- query	Query: ACACTGCAGAGATCTCAGTNGG	hit: ACACTGCAGACTTCTCAGTTGG	Del 2	2	Yes	Chr12:11412781-11412802	-	11412787	7.01
ACACTGTAGAGATTCTCAGATTGG -- hit ACACTGCAGAGANTCTCAGCTNGG -- query	Query: ACACTGCAGAGANTCTCAGCTNGG	hit: ACACTGTAGAGATTCTCAGATTGG	Ins 8	2	Yes	Chr1:239559306-239559329	-	239559312	7.03
ACACTGAGAGATGTCAGTTGGG -- hit ACACTGAGAGATCTCAGCTNGG -- query	Query: ACACTGAGAGATCTCAGCTNGG	hit: ACACTGAGAGATGTCAGTTGGG	Del 14	2	Yes	Chr10:115690641-115690662	+	115690656	7.04
ACATGCAGACATCTCAGCAAGG -- hit ACATGCAGAGATCTCAGCTNGG -- query	Query: ACATGCAGAGATCTCAGCTNGG	hit: ACATGCAGACATCTCAGCAAGG	Del 17	2	Yes	Chr10:133658804-133658825	-	133658810	7.38
ACATGCAGACATCTCAGCAAGG -- hit ACATGCAGAGATCTCAGCTNGG -- query	Query: ACATGCAGAGATCTCAGCTNGG	hit: ACATGCAGACATCTCAGCAAGG	Del 17	2	Yes	Chr4:190059603-190059624	-	190059609	7.38
TCACTGCAGAGTTCTCAGCAGG -- hit ACACTGCAGAGATCTCAGCNGG -- query	Query: ACACTGCAGAGATCTCAGCNGG	hit: TCACTGCAGAGTTCTCAGCAGG	Del 1	2	Yes	Chr13:27809803-27809824	+	27809818	7.43
ACCTGCAGAGTTCTCAGCCAGG -- hit ACCTGCAGAGATCTCAGCTNGG -- query	Query: ACCTGCAGAGATCTCAGCTNGG	hit: ACCTGCAGAGTTCTCAGCCAGG	Del 18	2	Yes	Chr17:49213548-49213569	+	49213563	7.46
ACACTGCAGAGAGCCCACTTGG -- hit ACACTGCAGAGATCTCACTNGG -- query	Query: ACACTGCAGAGATCTCACTNGG	hit: ACACTGCAGAGAGCCCACTTGG	Del 3	2	Yes	Chr14:64170561-64170582	-	64170567	7.51
ACACTGAGAGAGCTCAGCAGGG -- hit ACACTGAGAGATCTCAGCTNGG -- query	Query: ACACTGAGAGATCTCAGCTNGG	hit: ACACTGAGAGAGCTCAGCAGGG	Del 14	2	Yes	Chr10:75594181-75594202	+	75594196	7.84
ACATCTGCAGAGAGCTCAGCCTGG -- hit ACANCTGCAGAGATCTCAGCTNGG -- query	Query: ACANCTGCAGAGATCTCAGCTNGG	hit: ACATCTGCAGAGAGCTCAGCCTGG	Ins 17	2	Yes	Chr1:17658498-17658521	-	17658504	7.97
ACACTCAGAGATATCAGCCAGG -- hit ACACTCAGAGATCTCAGCTNGG -- query	Query: ACACTCAGAGATCTCAGCTNGG	hit: ACACTCAGAGATATCAGCCAGG	Del 15	2	Yes	Chr13:80777836-80777857	-	80777842	8.02
ACACTGCAGGGATCTAAGTAGG -- hit ACACTGCAGAGATCTCAGTNGG -- query	Query: ACACTGCAGAGATCTCAGTNGG	hit: ACACTGCAGGGATCTAAGTAGG	Del 2	2	Yes	Chr13:43695284-43695305	+	43695299	8.31
CCACTGCAGAGATCCCAGCTGG -- hit ACACTGCAGAGATCTCAGCNGG -- query	Query: ACACTGCAGAGATCTCAGCNGG	hit: CCACTGCAGAGATCCCAGCTGG	Del 1	2	Yes	Chr1:31658913-31658934	+	31658928	8.53
AAACTGCAGAGATCTCTGTGGG -- hit ACACTGCAGAGATCTCAGTNGG -- query	Query: ACACTGCAGAGATCTCAGTNGG	hit: AAACTGCAGAGATCTCTGTGGG	Del 2	2	Yes	Chr17:76049293-76049314	+	76049308	8.64
ACACTGCAGAGCTCTCTGTCTGGG -- hit ACACTGCAGAGATCTCAGNCTNGG -- query	Query: ACACTGCAGAGATCTCAGNCTNGG	hit: ACACTGCAGAGCTCTCTGTCTGGG	Ins 2	2	Yes	Chr4:6297689-6297712	-	6297695	9.5
CACTGCAGAGATCTCAGACTGG -- hit CACTGCAGAGATCTCAGCTNGG -- query	Query: CACTGCAGAGATCTCAGCTNGG	hit: CACTGCAGAGATCTCAGACTGG	Del 20	2	Yes	Chr6:12677923-12677944	+	12677938	11.63
CACTGGAGAGATCTCAGCTCAG -- hit CACTGCAGAGATCTCAGCTNGG -- query	Query: CACTGCAGAGATCTCAGCTNGG	hit: CACTGGAGAGATCTCAGCTCAG	Del 20	2	Yes	Chr17:45064765-45064786	-	45064771	20.86
ACCTCCAGAGATCTCAGCTCAG -- hit ACCTGCAGAGATCTCAGCTNGG -- query	Query: ACCTGCAGAGATCTCAGCTNGG	hit: ACCTCCAGAGATCTCAGCTCAG	Del 18	2	Yes	Chr12:62642662-62642683	+	62642677	20.87
AGACTGCTGAGATCTCAGCTCG -- hit ACACTGCAGAGATCTCAGCTNG -- query	Query: ACACTGCAGAGATCTCAGCTNG	hit: AGACTGCTGAGATCTCAGCTCG	Del PAM 1, or Del PAM 2	2	No	ChrX:52686529-52686550	+	52686544	20.91
AGACTGCTGAGATCTCAGCTCG -- hit ACACTGCAGAGATCTCAGCTNG -- query	Query: ACACTGCAGAGATCTCAGCTNG	hit: AGACTGCTGAGATCTCAGCTCG	Del PAM 1, or Del PAM 2	2	No	ChrX:52771890-52771911	-	52771896	20.91
CACTGCAGAGCTCTCAGCTACG -- hit CACTGCAGAGATCTCAGCTNGG -- query	Query: CACTGCAGAGATCTCAGCTNGG	hit: CACTGCAGAGCTCTCAGCTACG	Del 20	2	No	Chr20:10132108-10132129	+	10132123	21.43
AACTGCAGAGCTCTCAGCTGGA -- hit AACTGCAGAGATCTCAGCTNGG -- query	Query: AACTGCAGAGATCTCAGCTNGG	hit: AACTGCAGAGCTCTCAGCTGGA	Del 19	2	No	Chr2:211971228-211971249	-	211971234	21.44
ACACTACAGAGTCTCAGCTGCG -- hit ACACTGCAGAGTCTCAGCTNGG -- query	Query: ACACTGCAGAGTCTCAGCTNGG	hit: ACACTACAGAGTCTCAGCTGCG	Del 9	2	No	Chr2:9148176-9148197	+	9148191	21.52
ACACTGCAAGATTTCAGCTCGT -- hit ACACTGCAAGATCTCAGCTNGG -- query	Query: ACACTGCAAGATCTCAGCTNGG	hit: ACACTGCAAGATTTCAGCTCGT	Del 12	2	No	Chr14:80778133-80778154	+	80778148	22.16
ACATGCAGAGATCCCAGCTCTG -- hit ACATGCAGAGATCTCAGCTNGG -- query	Query: ACATGCAGAGATCTCAGCTNGG	hit: ACATGCAGAGATCCCAGCTCTG	Del 17	2	No	Chr19:945185-945206	+	945200	22.58
ACATGCAGAGATCACAGCTGAG -- hit ACATGCAGAGATCTCAGCTNGG -- query	Query: ACATGCAGAGATCTCAGCTNGG	hit: ACATGCAGAGATCACAGCTGAG	Del 17	2	Yes	Chr10:133457845-133457866	-	133457851	22.58
ACACTCCAGAGATCTAGCTTGT -- hit ACACTGCAGAGATCTAGCTNGG -- query	Query: ACACTGCAGAGATCTAGCTNGG	hit: ACACTCCAGAGATCTAGCTTGT	Del 5	2	No	Chr12:43391173-43391194	-	43391179	23.02
AACTGCAGAGATCTCTGCTTTG -- hit AACTGCAGAGATCTCAGCTNGG -- query	Query: AACTGCAGAGATCTCAGCTNGG	hit: AACTGCAGAGATCTCTGCTTTG	Del 19	2	No	Chr13:90766625-90766646	+	90766640	23.64
ACACTGCTGAGATCTCACTGGC -- hit ACACTGCAGAGATCTCACTNGG -- query	Query: ACACTGCAGAGATCTCACTNGG	hit: ACACTGCTGAGATCTCACTGGC	Del 3	2	No	Chr3:43161120-43161141	+	43161135	24.78
ACACTGAAGAGATCTCATCTATGG -- hit ACACTGCAGAGATCTCAGCTNNGG -- query	Query: ACACTGCAGAGATCTCAGCTNNGG	hit: ACACTGAAGAGATCTCATCTATGG	Ins PAM 2, or Ins PAM 3	2	Yes	Chr4:56468291-56468314	-	56468297	24.93
ACCTGCAGAGATCTCAGATAGA -- hit ACCTGCAGAGATCTCAGCTNGG -- query	Query: ACCTGCAGAGATCTCAGCTNGG	hit: ACCTGCAGAGATCTCAGATAGA	Del 18	2	No	Chr6:121571574-121571595	+	121571589	25.66
ACACTGCAGAGATCACAGACTGTG -- hit ACACTGCAGAGATCTCAGNCTNGG -- query	Query: ACACTGCAGAGATCTCAGNCTNGG	hit: ACACTGCAGAGATCACAGACTGTG	Ins 2	2	No	Chr6:161772346-161772369	+	161772363	27.6
ACACTGCAGAATCTCAGCTGTT -- hit ACACTGCAGAATCTCAGCTNGG -- query	Query: ACACTGCAGAATCTCAGCTNGG	hit: ACACTGCAGAATCTCAGCTGTT	Del 10	2	No	Chr4:111289304-111289325	-	111289310	41.21
