# Supplementary material for: Correcting Autoinflammation in STING-Associated Vasculopathy with Onset in Infancy (SAVI) by Human Stem Cell Genome-Editing
Source: Research Square preprint supplement (doi:10.21203/rs.3.rs-5090716/v1), 2024-10-21
Supplement: Supplementary file 2 [file 40303f2e7509d1975566f8ed.ai]

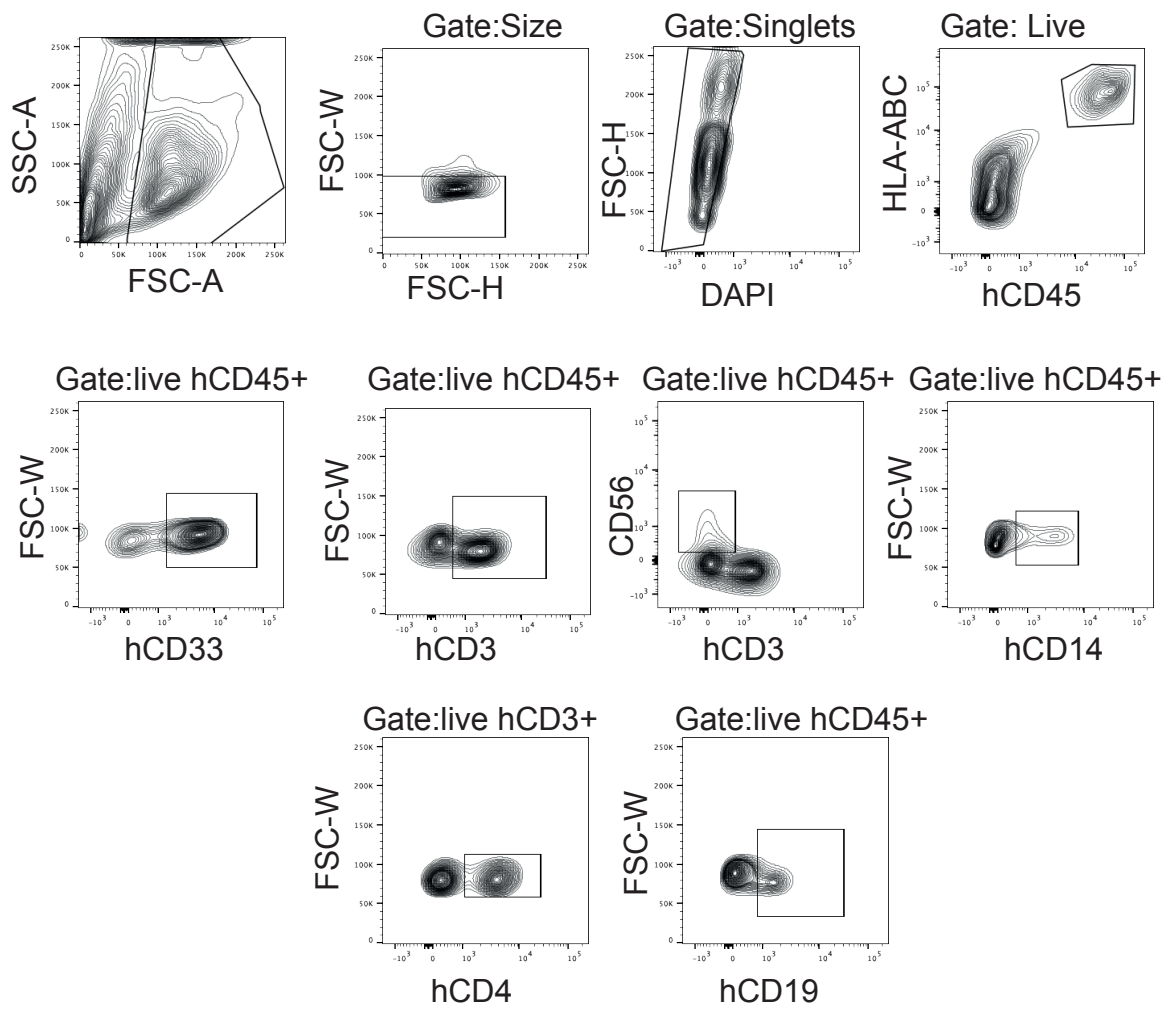

**Supplementary Fig. 5:** Gating strategy for multilineage analysis. The following gating strategy was used to analyze multilineage development in vivo (Figure 5).
