# Supplementary material for: Correcting Autoinflammation in STING-Associated Vasculopathy with Onset in Infancy (SAVI) by Human Stem Cell Genome-Editing
Source: Research Square preprint supplement (doi:10.21203/rs.3.rs-5090716/v1), 2024-10-21
Supplement: Supplementary file 4 [file f4094b0d1c1cd39f1bf342d7.ai]

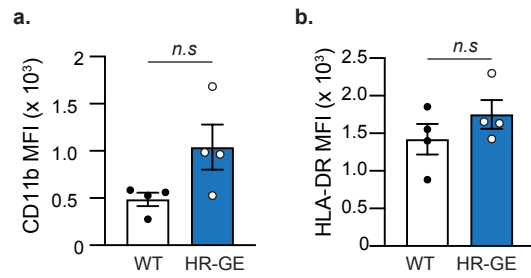

**Supplementary Fig. 3** Edited HSPC-derived monocytes/macrophages have a normal phenotype. FACS based **a.** CD11b and **b.** HLA-DR expression in HR-GE-derived monocytes/macrophages. Data shown as mean  $\pm$  sem. Stats: Mann-Whitney test. *n.s.* : not significant.
